# Supplementary material for: Pax4 is not essential for beta-cell differentiation in zebrafish embryos but modulates alpha-cell generation by repressing arx gene expression
Source: PubMed Central journal article supplement (PMC3563606; doi:10.1186/1471-213x-12-37), 2012-12-17

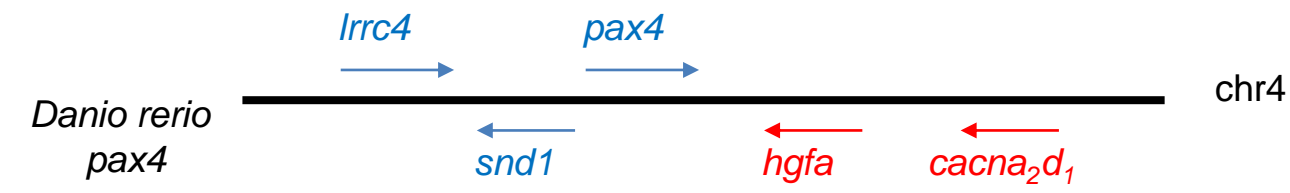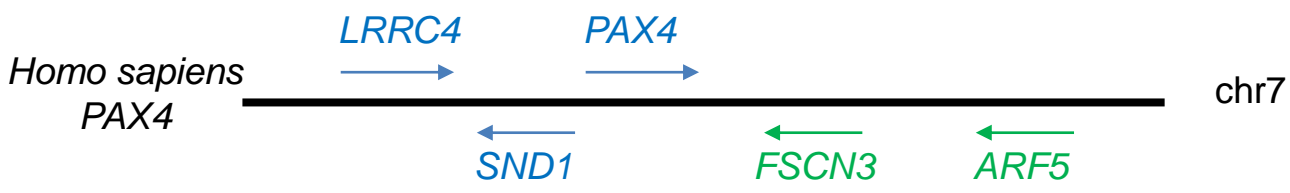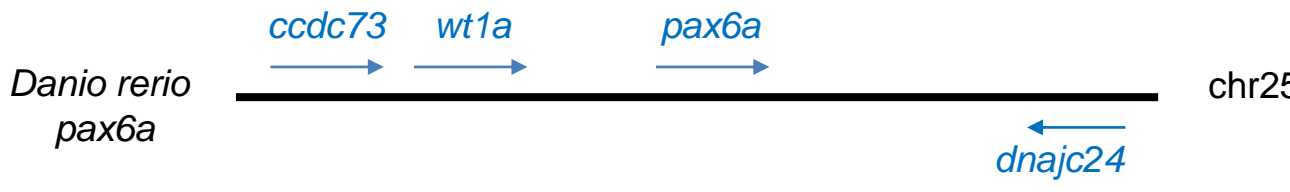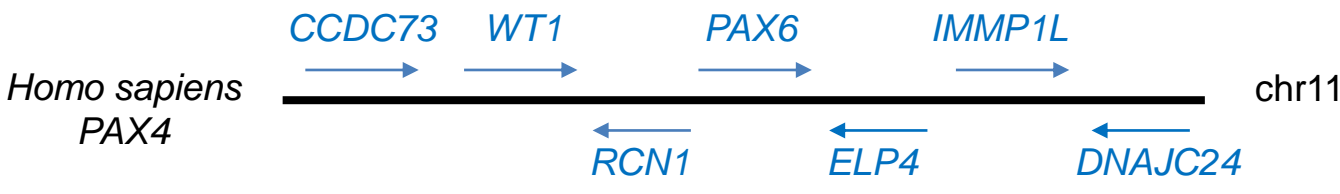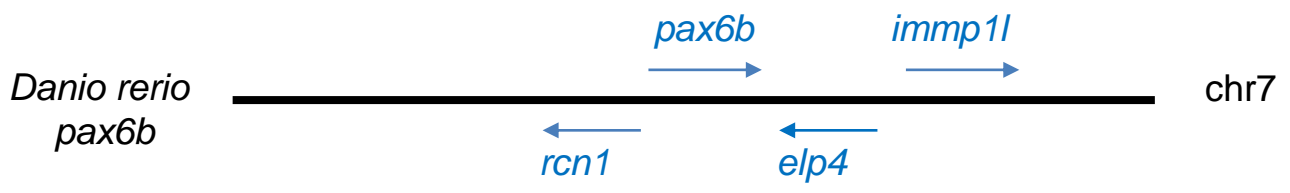

Supplement: 1471-213X-12-37-S2.pdf [file 1471-213X-12-37-S2.pdf]
